# Supplementary material for: Melatonin Improves Oocyte Maturation and Mitochondrial Functions by Reducing Bisphenol A-Derived Superoxide in Porcine Oocytes In Vitro
Source: PubMed Central journal article supplement (PMC6274783; doi:10.3390/ijms19113422), 2018-10-31
Supplement: ijms-19-03422-s001.pdf [file ijms-19-03422-s001.pdf]

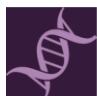

Supplementary Materials:

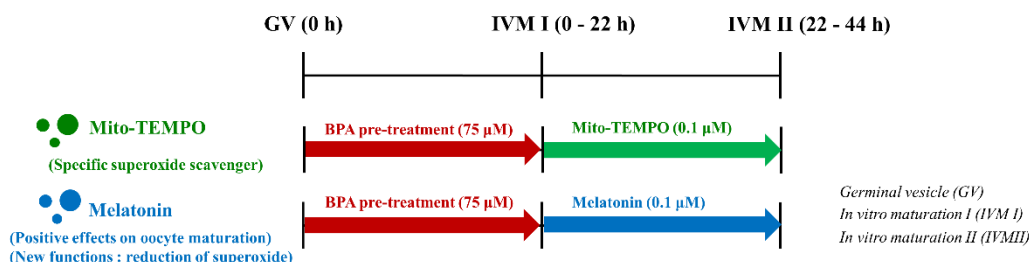

Supplementary Fig. 1 Graphical description of Mito-TEMPO or melatonin treatment in porcine oocyte maturation

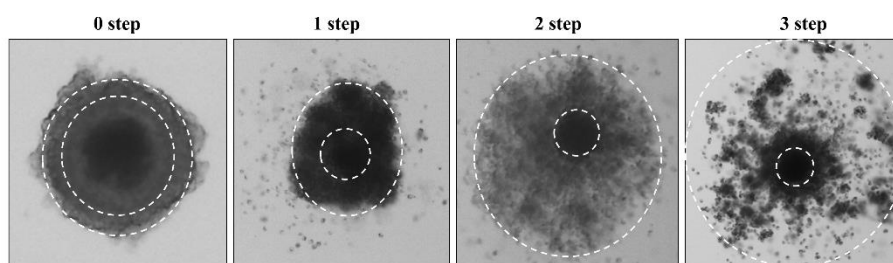

Supplementary Fig. 2 Division of cumulus cells expansion in porcine COCs at 44 h of IVM.

The degree of expansion was assessed according to a subjective scoring system from 0 to 3 steps as follows: 0 step is no expansion, 1 step is separation of only the outermost layer of cumulus cell, 2 step is further expansion involving the outer half of the cumulus oophorus, 3 step is further expansion up to, complete expansion including the corona radiata cells.

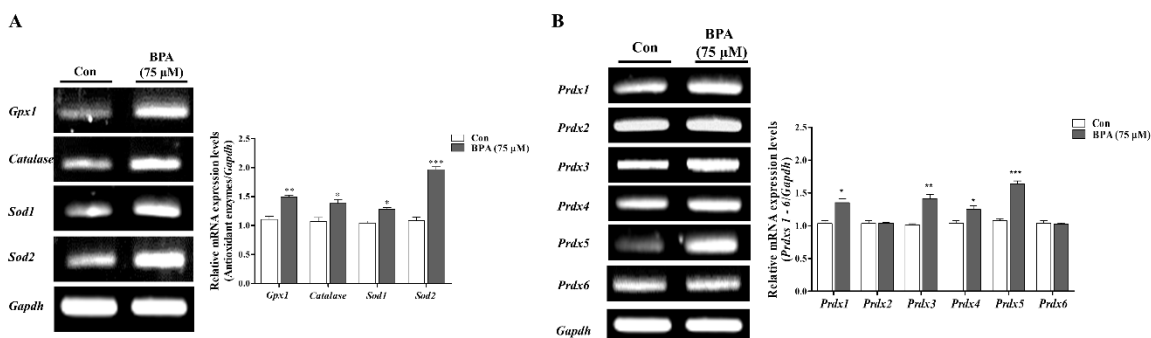

Supplementary Fig. 3 Changes in antioxidant enzymes in maturing COCs after BPA treatment during porcine oocyte maturation. (A and B) The mRNA levels of antioxidant enzymes (A; Gpx1, Catalase, Sod1 and Sod2, B; Prdx1, Prdx2, Prdx3, Prdx4, Prdx5 and Prdx6) in porcine maturing COCs after BPA 75  $\mu\text{M}$  treatment were measured using RT-PCR. Relative folds of the genes were obtained by normalizing the signals to *Gapdh*. Histograms represent the values of densitometry analysis obtained using ImageJ software. Data in the bar graph are presented as the means  $\pm$  SEM of three independent experiments (per 30 COCs). Differences were considered significant at \*  $p < 0.05$ , \*\*  $p < 0.01$ , \*\*\*;  $p < 0.001$  compared to the control group.
